# Supplementary material for: Studies on the enantiomers of ZJM-289: synthesis and biological evaluation of antiplatelet, antithrombotic and neuroprotective activities
Source: Royal Society of Chemistry journal article supplement (doi:10.1039/c2ob26511g), 2012-01-01

## Supporting Information

### **Studies on the enantiomers of ZJM-289: synthesis and biological evaluation of antiplatelet, antithrombotic and neuroprotective activities**

Xiaoli Wang, Qian Zhao, Xuliang Wang, Tingting Li, Yisheng Lai, Sixun Peng, Hui Ji, Jinyi Xu, and Yihua Zhang\*

**1. HPLC conditions and chromatograms of ZJM-289, (*S*)- and (*R*)-ZJM-289 S2**

**2. Chiral HPLC conditions and chromatograms of (*S*)- and (*R*)-NBP, (*S*)- and (*R*)-ZJM-289 S3-S4**

## 1. HPLC conditions and chromatograms of ZJM-289, (*S*)- and (*R*)-ZJM-289

### HPLC conditions:

Column: Shimadzu OD 250×4.6 mm×5 μm

Mobile phase: Acetonitrile: Water = 90:10;

Wavelength: 254 nm;

Rate: 1 mL/min;

Temperature: 40 °C;

**ZJM-289, 100%**

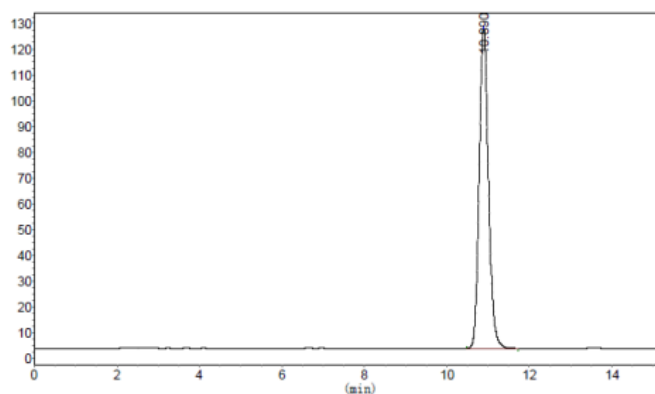

**(*S*)-ZJM-289, 99.7%**

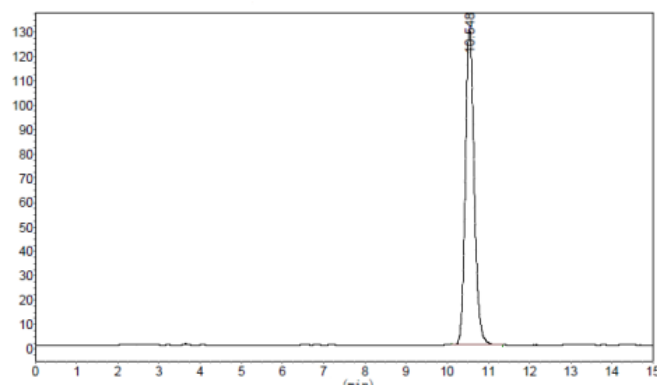

**(*R*)-ZJM-289, 99.6%**

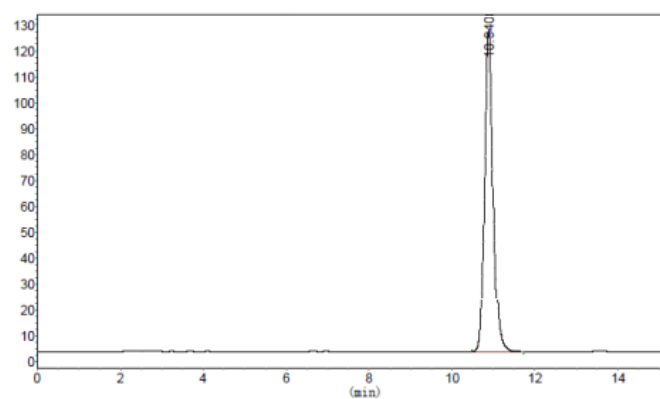

## 2. Chiral HPLC conditions and chromatograms of (*S*)- and (*R*)-NBP, (*S*)- and (*R*)-ZJM-289

## 2.1 (S)- and (R)-NBP

### Chiral HPLC conditions:

Column: Chiralpak IA (250mm×4.6mm×5μm);

Mobile phase: Hexane : Isopropanol : Diethylamine = 90:10:0.1;

Wavelength: 220 nm;

Rate: 1 mL/min;

Temperature: 25 °C;

(S)-NBP, 98.1%

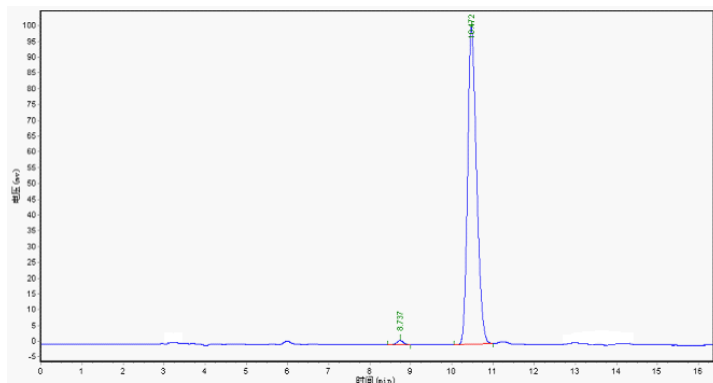

(R)-NBP, 97.4%

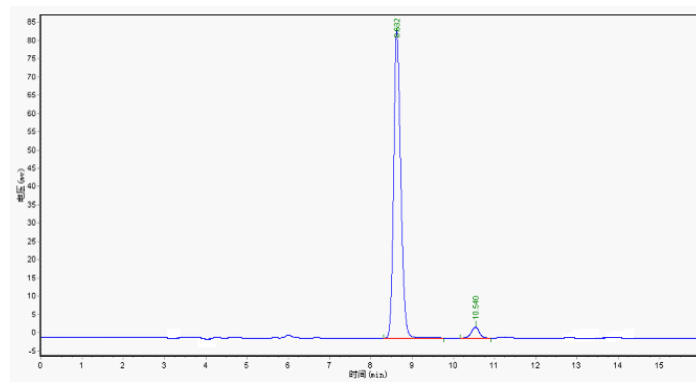

## 2.2 (S)- and (R)-ZJM-289

### Chiral HPLC conditions:

Column: Chiralpak IA (250mm×4.6mm×5μm);

Mobile phase: Hexane : Ethanol : Diethylamine  
= 80:20:0.1;

Wavelength: 280 nm;

Rate: 1 mL/min;

Temperature: 25 °C;

(S)-ZJM-289, 99.5%

(R)-ZJM-289, 98.6%

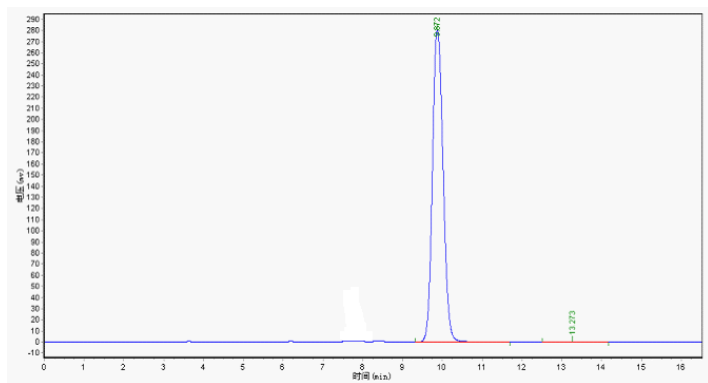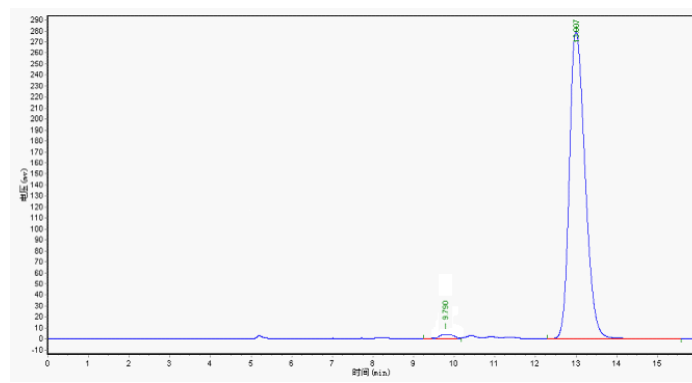

Supplement: c2ob26511g.pdf [file c2ob26511g.pdf]
